# Supplementary material for: Insight into the dissolution–crystallization strategy towards macro/meso/microporous Silicalite-1 zeolites and their performance in the Beckmann rearrangement of cyclohexanone oxime
Source: Royal Society of Chemistry journal article supplement (doi:10.1039/c8cy00885j), 2018-01-01
Supplement: c8cy00885j1.pdf [file c8cy00885j1.pdf]

Supporting information

**Insight into the dissolution-crystallization strategy towards  
macro/meso/microporous Silicalite-1 zeolites and their  
performance in the Beckmann rearrangement of  
cyclohexanone oxime**

Yanfei Zhang<sup>abc</sup>, Lanjian Xu<sup>ab</sup>, Jie Zhang<sup>ab</sup>, Peidong Li<sup>abc</sup>, Yangyang Yuan<sup>a</sup>, Hongchen Guo<sup>c</sup>,  
Xiaomin Zhang<sup>a\*</sup> and Lei Xu<sup>a\*</sup>

*<sup>a</sup> National Laboratory for Clean Energy, Dalian Institute of Chemical Physics, Chinese Academy of Sciences, Dalian 116023, People's  
Republic of China; Email: xulei808@dicp.ac.cn, zhangxm@dicp.ac.cn; Fax: +86 411 82463032; Tel: +86 411 82463032*

*<sup>b</sup> University of Chinese Academy of Sciences, Beijing 100049, People's Republic of China.*

*<sup>c</sup> State Key Laboratory of Fine Chemicals & School of Chemical Engineering, Dalian University of Technology, Dalian 116023, People's  
Republic of China.*

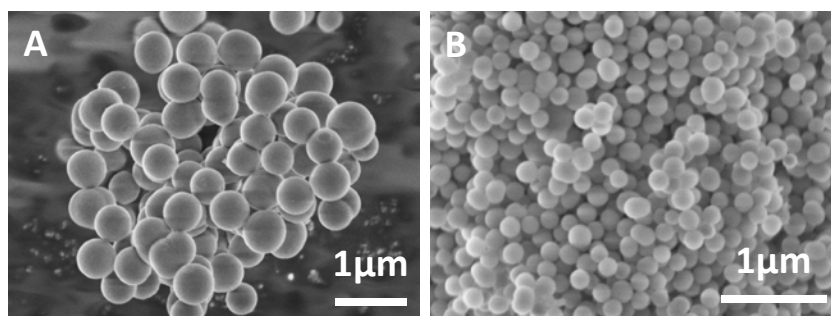

Fig. S1 SEM images of MSS-500 (A) and MSS-150 (B)

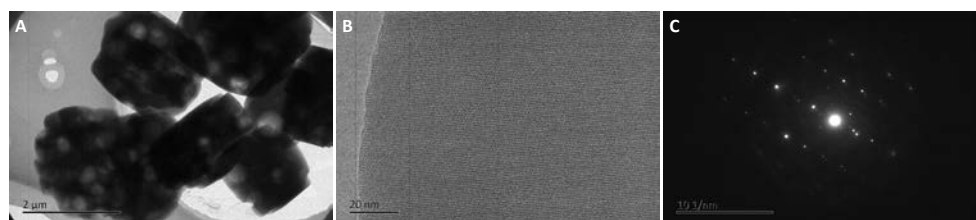

Fig. S2 Low-magnification TEM image (A), HRTEM image (B) and SAED pattern (C) of HM-Silicalite-1(500)

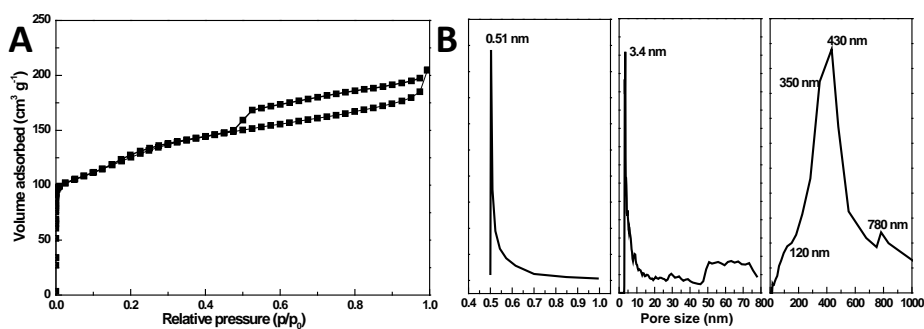

Fig. S3 N<sub>2</sub> adsorption-desorption isotherms (A) and pore size distributions (B) of the hierarchical sample HM-Silicalite-1(500) calculated by HK method, NLDFT method and Hg intrusion porosimetry, respectively

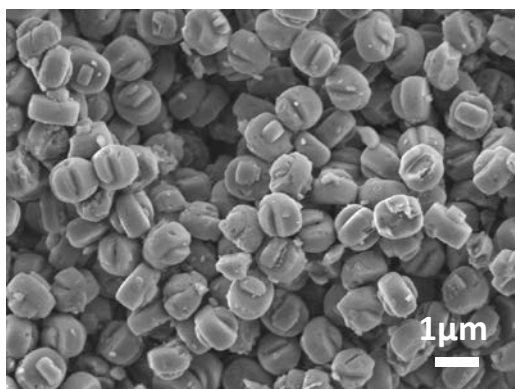

Fig. S4 SEM image of the conventional microporous sample conv-Silicalite-1

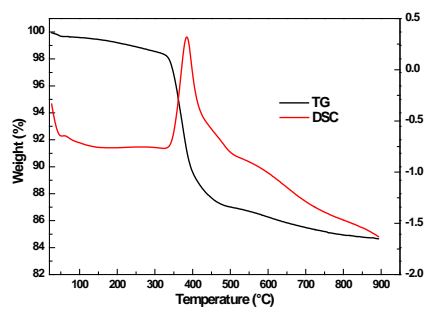

Fig. S5 TGA and DSC curves of as-prepared hierarchical sample HM-Silicalite-1(500).

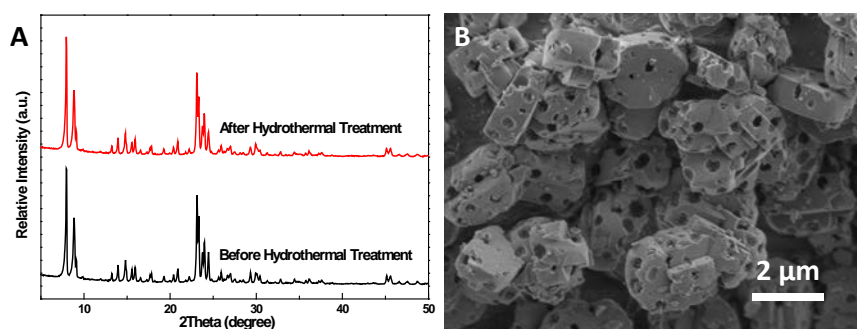

Fig. S6 Hydrothermal stability tests: (A) XRD pattern of HM-Silicalite-1 before and after hydrothermal treatment; (B) SEM image of HM-Silicalite-1 after hydrothermal treatment.

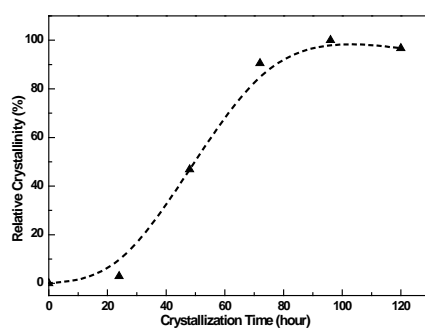

Fig. S7 Variation of relative crystallinity (RC) of HM-Silicalite-1(500) with the extension of crystallization time.

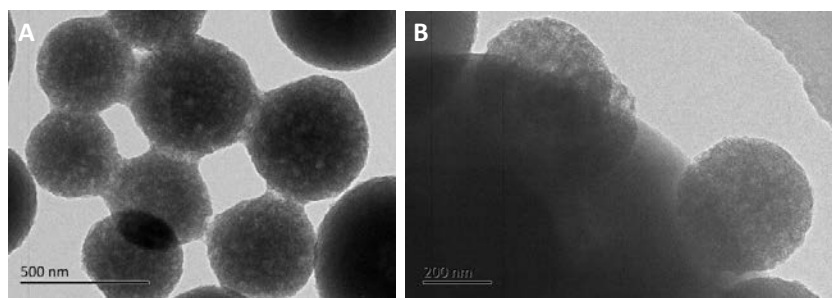

Fig. S8 TEM images of sample HM-Silicalite-1(500) crystallized at 48 h.

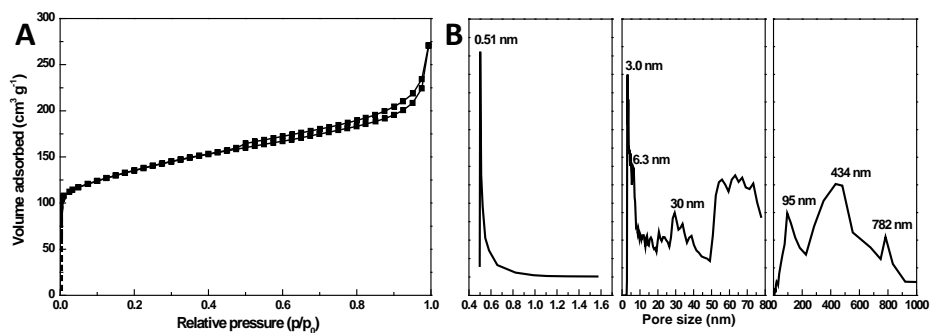

Fig. S9 N<sub>2</sub> adsorption-desorption isotherms (A) and pore size distributions (B) of hierarchical sample HM-Silicalite-1(150) calculated by HK method, NLDFT method and Hg intrusion porosimetry, respectively.

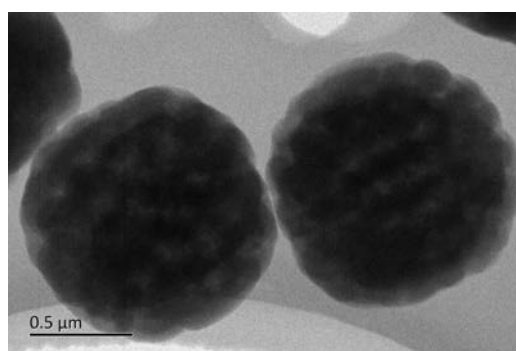

Fig. S10 Low-magnification TEM image of HM-Silicalite-1(150).

**Table S1** Synthesis conditions of the Silicalite-1 samples

| Sample               | Starting gel composition |                                   | Crystallization temperature/K |
|----------------------|--------------------------|-----------------------------------|-------------------------------|
|                      | TPAOH/SiO <sub>2</sub>   | H <sub>2</sub> O/SiO <sub>2</sub> |                               |
| HM-Silicalite-1(500) | 0.17                     | 0.9                               | 383                           |
| HM-S1                | 0.07                     | 0.9                               | 383                           |
| HM-S2                | 0.25                     | 0.9                               | 383                           |
| HM-S3                | 0.17                     | 0.9                               | 403                           |
| HM-S4                | 0.17                     | 0.9                               | 423                           |
| HM-S5                | 0.17                     | 0.4                               | 383                           |
| HM-S6                | 0.17                     | 1.3                               | 383                           |
| HM-S7                | 0.17                     | 1.8                               | 383                           |
| HM-Silicalite-1(150) | 0.25                     | 1.8                               | 383                           |
